# Supplementary material
Source: publisher figshare collection journal article supplement (https://karger.figshare.com/ndownloader/files/24618824)
Supplement: Supplementary file 1 [file 24618824]

**Supplementary Table 2 Top 20 differentially expressed mRNAs in ischemic stroke**

| **ID** | **Symbol** | **FDR** | **Up/down** |
| --- | --- | --- | --- |
| 3399 | ID3 | 1.48E-06 | down |
|  |  |  |  |
| 121642 | ALKBH2 | 2.45E-06 | down |
|  |  |  |  |
| 7693 | ZNF134 | 2.85E-06 | down |
|  |  |  |  |
| 3384 | ICAM2 | 3.70E-06 | down |
|  |  |  |  |
| 4809 | NHP2L1 | 3.81E-06 | down |
|  |  |  |  |
| 348378 | SHISAL2A | 4.49E-06 | down |
|  |  |  |  |
| 79810 | PTCD2 | 4.53E-06 | down |
|  |  |  |  |
| 55876 | GSDMB | 5.25E-06 | down |
|  |  |  |  |
| 55552 | ZNF823 | 5.91E-06 | down |
|  |  |  |  |
| 79077 | DCTPP1 | 6.56E-06 | down |
|  |  |  |  |
| 6504 | SLAMF1 | 8.06E-06 | down |
|  |  |  |  |
| 25804 | LSM4 | 9.47E-06 | down |
|  |  |  |  |
| 55127 | HEATR1 | 1.07E-05 | down |
|  |  |  |  |
| 1677 | DFFB | 1.07E-05 | down |
|  |  |  |  |
| 80194 | TMEM134 | 1.61E-05 | down |
|  |  |  |  |
| 8270 | LAGE3 | 1.80E-05 | down |
|  |  |  |  |
| 26048 | ZNF500 | 1.80E-05 | down |
|  |  |  |  |
| 23409 | SIRT4 | 1.93E-05 | down |
|  |  |  |  |
| 871 | SERPINH1 | 1.97E-05 | down |
|  |  |  |  |
| 11278 | KLF12 | 1.97E-05 | down |
|  |  |  |  |
| 728 | C5AR1 | 1.32E-06 | up |
|  |  |  |  |
| 1387 | CREBBP | 1.32E-06 | up |
|  |  |  |  |
| 5997 | RGS2 | 1.74E-06 | up |
|  |  |  |  |
| 383 | ARG1 | 2.85E-06 | up |
|  |  |  |  |
| 1843 | DUSP1 | 3.81E-06 | up |
|  |  |  |  |
| 1520 | CTSS | 4.07E-06 | up |
|  |  |  |  |
| 83716 | CRISPLD2 | 4.08E-06 | up |
|  |  |  |  |
| 8349 | HIST2H2BE | 4.48E-06 | up |
|  |  |  |  |
| 5990 | RFX2 | 5.25E-06 | up |
|  |  |  |  |
| 84898 | PLXDC2 | 1.07E-05 | up |
|  |  |  |  |
| 6583 | SLC22A4 | 1.97E-05 | up |
|  |  |  |  |
| 10970 | CKAP4 | 2.07E-05 | up |
|  |  |  |  |
| 6303 | SAT1 | 2.16E-05 | up |
|  |  |  |  |
| 3340 | NDST1 | 2.21E-05 | up |
|  |  |  |  |
| 221037 | JMJD1C | 2.62E-05 | up |
|  |  |  |  |
| 3684 | ITGAM | 3.12E-05 | up |
|  |  |  |  |
| 118429 | ANTXR2 | 3.12E-05 | up |
|  |  |  |  |
| 51108 | METTL9 | 3.19E-05 | up |
|  |  |  |  |
| 81565 | NDEL1 | 4.22E-05 | up |
|  |  |  |  |
| 329 | BIRC2 | 4.40E-05 | up |

FDR: false discovery rate
